# Supplementary material for: LASSO-Cox Modeling of Survival Using High-Resolution CT-Based Radiomic Features in a Cohort of COVID-19 Patients and Its Generalizability to Standard Image Reconstruction
Source: MDPI journal article supplement (doi:10.3390/app122312065), 2022-11-25
Supplement: s1 [file s1]

**Table S1:** Occurrence rate of RFs ( $\geq 10\%$ ) generated out of 100 LASSO-Cox models using the training datasets

| <i><b>Feature Name</b></i>                             | <i><b>Occurence Rate (%)</b></i> |
|--------------------------------------------------------|----------------------------------|
| Intensity histogram quartile coefficient of dispersion | 85                               |
| Area density enclosing ellipsoid                       | 63                               |
| Normalised zone distance non uniformity                | 49                               |
| Min value                                              | 47                               |
| Cluster shade                                          | 46                               |
| Volume density aligned bounding box                    | 44                               |
| Large distance high grey level emphasis                | 38                               |
| Volume at intensity fraction 90                        | 38                               |
| Volume density enclosing ellipsoid                     | 37                               |
| Intensity based interquartile range                    | 36                               |
| Volume density convex hull                             | 27                               |
| Area density aligned bounding box                      | 21                               |
| Coarseness                                             | 19                               |
| Quartile coefficient of dispersion                     | 19                               |
| Normalized dependence count non uniformity             | 17                               |
| Maximum 3D diameter cm                                 | 15                               |
| Inverse variance                                       | 14                               |
| Normalised grey level non uniformity GLDZM             | 14                               |
| Normalised grey level non uniformity GLSZM             | 14                               |
| Difference variance                                    | 13                               |
| Flatness                                               | 12                               |
| Intensity histogram mode                               | 12                               |
| Local intensity peak                                   | 12                               |
| Zone distance entropy                                  | 11                               |
| Maximum histogram gradient intensity                   | 10                               |
